# Supplementary material for: Cocaine Self-Administration Influences Central Nervous System Immune Responses in Male HIV-1 Transgenic Rats
Source: MDPI journal article supplement (doi:10.3390/cells11152405), 2022-08-04
Supplement: s1 [file s1]

**Table S1.** Caudal striatum (cSTR) cytokine level summary statistics stratified by rat model WT vs. HIV-1<sub>Tg</sub>. Student's t-tests with unequal variance were used to compare the difference in mean expression levels (and SD) of each cytokine, chemokine, or growth factor in WT (saline-yoked (*n* = 7) and cocaine SA (*n* = 8)) and HIV-1<sub>Tg</sub> (saline-yoked (*n* = 6) and cocaine SA (*n* = 6)) in the cSTR. The 95% CI, overall p value and cumulative replicates are given in the table. Bold cytokines, chemokines, or growth factors indicate targets that were significantly increased in HIV-1<sub>Tg</sub> rats compared to WT.

| Cytokine<br>(log <sub>2</sub><br>Transformed) | WT              |                 |                    |         |                                  | HIV-1 <sub>Tg</sub> |                  |                    |         |                                  |
|-----------------------------------------------|-----------------|-----------------|--------------------|---------|----------------------------------|---------------------|------------------|--------------------|---------|----------------------------------|
|                                               | Saline          | Cocaine         | 95% CI             | p-value | Adjusted p-value<br>(Bonferroni) | Saline              | Cocaine          | 95% CI             | p-value | Adjusted p-value<br>(Bonferroni) |
|                                               | Mean            | Mean            |                    |         |                                  | Mean                | Mean             |                    |         |                                  |
|                                               | (SD)            | (SD)            |                    |         |                                  | (SD)                | (SD)             |                    |         |                                  |
| G-CSF                                         | 0.44<br>(0.81)  | 0.09 (0.63)     | [-0.595,<br>1.29]  | 0.428   | 0.430                            | 0.34 (0.70)         | 0.46 (0.45)      | [-0.811,<br>0.574] | 0.711   | 0.710                            |
| GM-CSF                                        | 3.03<br>(0.64)  | 2.70 (0.60)     | [-0.46,<br>1.13]   | 0.369   | 0.370                            | 2.44 (0.55)         | 2.59 (0.35)      | [-0.610,<br>0.392] | 0.555   | 0.560                            |
| GRO/KC                                        | -0.49<br>(0.93) | -1.47<br>(1.14) | [-0.433,<br>2.40]  | 0.151   | 0.150                            | -2.56<br>(2.42)     | -0.91<br>(0.68)  | [-3.90,<br>0.602]  | 0.126   | 0.130                            |
| IFN- $\gamma$                                 | 3.60<br>(0.79)  | 3.23 (0.62)     | [-0.543,<br>1.29]  | 0.383   | 0.380                            | 3.71 (0.79)         | 3.91 (0.38)      | [-0.948,<br>0.544] | 0.551   | 0.550                            |
| IL-1 $\alpha$                                 | -0.29<br>(1.35) | -0.38<br>(0.56) | [-1.34,<br>1.51]   | 0.894   | 0.890                            | -1.09<br>(1.17)     | -0.79<br>(1.38)  | [-1.79,<br>1.19]   | 0.666   | 0.670                            |
| IL-1 $\beta$                                  | 0.01<br>(0.50)  | -0.29<br>(0.77) | [-0.554,<br>1.16]  | 0.443   | 0.440                            | -0.06<br>(1.06)     | 0.28 (0.52)      | [-1.35,<br>0.669]  | 0.463   | 0.460                            |
| IL-2                                          | 9.08<br>(0.41)  | 8.74 (0.48)     | [-0.234,<br>0.92]  | 0.213   | 0.210                            | 8.74 (0.34)         | 8.77 (0.19)      | [-0.356,<br>0.297] | 0.845   | 0.840                            |
| IL-4                                          | -0.20<br>(0.47) | -0.57<br>(0.36) | [-0.181,<br>0.914] | 0.165   | 0.160                            | -1.51<br>(2.62)     | -0.471<br>(0.48) | [-4.28,<br>2.20]   | 0.428   | 0.430                            |
| IL-5                                          | 2.31<br>(0.89)  | 2.09 (0.75)     | [-0.840,<br>1.29]  | 0.646   | 0.650                            | 2.21 (0.58)         | 2.66 (0.22)      | [-1.00,<br>0.09]   | 0.088   | 0.088                            |
| IL-6                                          | 2.05<br>(0.87)  | 1.13 (2.06)     | [-1.27,<br>3.09]   | 0.352   | 0.350                            | 1.67 (0.14)         | 0.694<br>(1.06)  | [-0.676,<br>2.62]  | 0.162   | 0.160                            |
| IL-7                                          | 3.80<br>(0.70)  | 3.34 (0.64)     | [-0.408,<br>1.33]  | 0.265   | 0.270                            | 3.59 (0.65)         | 3.68 (0.37)      | [-0.717,<br>0.530] | 0.742   | 0.740                            |
| IL-10                                         | 3.56<br>(0.99)  | 3.15 (0.58)     | [-0.657,<br>1.49]  | 0.396   | 0.400                            | 4.98 (0.94)         | 5.25 (0.56)      | [-1.18,<br>0.642]  | 0.523   | 0.520                            |
| IL-12                                         | 1.99<br>(1.12)  | 1.48 (1.10)     | [-0.916,<br>1.94]  | 0.442   | 0.440                            | 2.58 (0.80)         | 3.03 (0.52)      | [-1.24,<br>0.338]  | 0.232   | 0.230                            |
| IL-18                                         | 4.06<br>(0.90)  | 3.77 (0.64)     | [-0.762,<br>1.34]  | 0.548   | 0.550                            | 3.44 (0.77)         | 3.67 (0.22)      | [-0.947,<br>0.485] | 0.469   | 0.470                            |
| M-CSF                                         | -1.65<br>(0.84) | -1.82<br>(1.05) | [-1.06,<br>1.41]   | 0.756   | 0.760                            | -7.65<br>(3.45)     | -5.42<br>(3.00)  | [-7.57,<br>3.11]   | 0.347   | 0.350                            |
| MCP-1                                         | 4.17<br>(0.76)  | 3.73 (0.70)     | [-0.491,<br>1.38]  | 0.313   | 0.310                            | 3.44 (1.10)         | 3.90 (0.50)      | [-1.49,<br>0.578]  | 0.339   | 0.340                            |
| MIP-3 $\alpha$                                | 0.52<br>(0.72)  | 0.13 (0.77)     | [-0.565,<br>1.36]  | 0.38    | 0.380                            | -0.75<br>(0.90)     | -0.51<br>(0.57)  | [-1.12,<br>0.636]  | 0.55    | 0.550                            |
| RANTES                                        | -1.90<br>(0.65) | -3.27<br>(1.03) | [-3.37,<br>6.10]   | 0.272   | 0.270                            | -1.86<br>(1.09)     | -1.47<br>(0.46)  | [-2.04,<br>1.26]   | 0.535   | 0.540                            |
| TNF- $\alpha$                                 | 6.76<br>(0.57)  | 6.46 (0.59)     | [-0.453,<br>1.05]  | 0.396   | 0.400                            | 6.15 (0.48)         | 6.18 (0.43)      | [-0.549,<br>0.490] | 0.904   | 0.900                            |
| VEGF                                          | 1.18<br>(3.94)  | 2.32 (3.54)     | [-13.3,<br>11.0]   | 0.763   | 0.760                            | 2.99 (1.40)         | 4.30 (0.87)      | [-2.83,<br>0.199]  | 0.08    | 0.080                            |

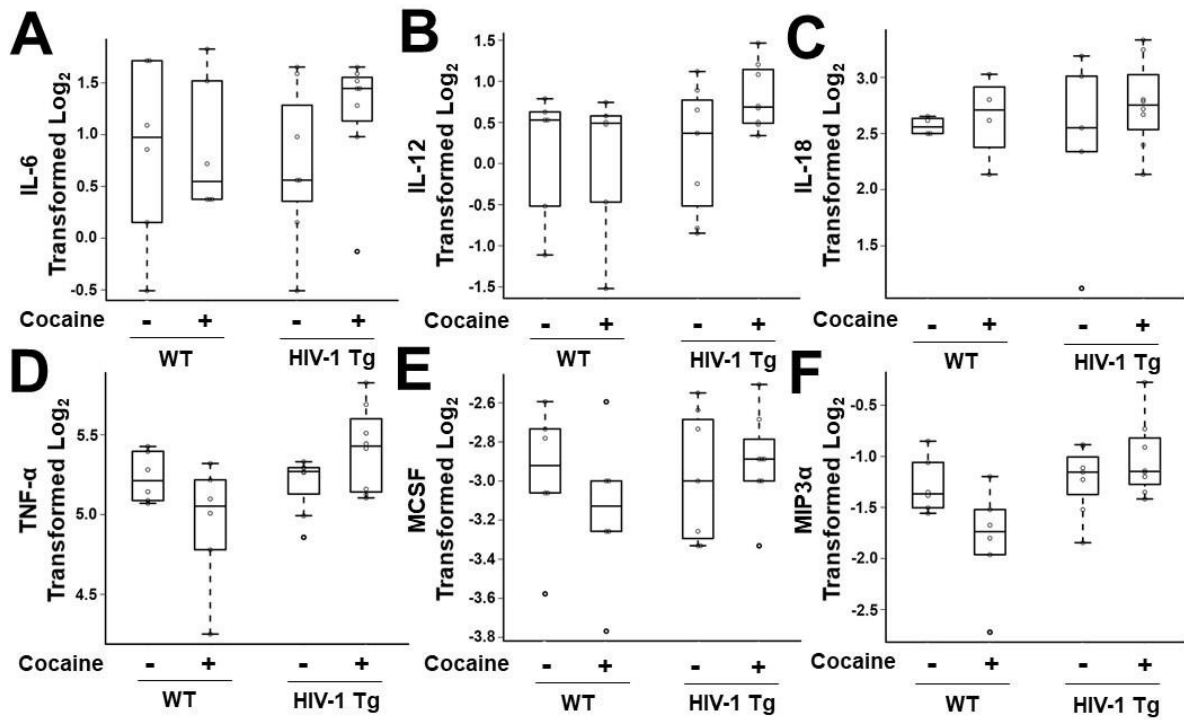

**Figure S1.** Cytokines with no significant difference in the fCTX of WT and HIV-1Tg rats. FCTX brain tissue was collected, and equivalent total protein lysates were assayed for cytokine levels from F344 saline-yoked ( $n=6$ ), F344 cocaine SA ( $n=6$ ), HIV-1Tg saline-yoked ( $n=7$ ), and HIV-1Tg cocaine SA ( $n=8$ ) male rats. Protein levels for IL-6 (A), IL-12 (B), IL-18 (C), TNF- $\alpha$  (D), MCSF (E), and MIP3 (F) are shown. Log<sub>2</sub> transformation was performed prior to statistical analyses since some expression levels were not normally distributed. All tests were conducted in R (version 3.6.1).
